# Supplementary material for: Ultrahigh-power-density BNT ferroelectric multilayer ceramic capacitors for pulse power energy conversion components
Source: Royal Society of Chemistry journal article supplement (doi:10.1039/d4tc03279a), 2024-01-01
Supplement: d4tc03279a1.pdf [file d4tc03279a1.pdf]

## Supporting information

# Ultrahigh-power-density BNT ferroelectric multilayer ceramic capacitors for pulse power energy conversion components

*Canyu Che<sup>a,b</sup>, Yizheng Bao<sup>b</sup>, Zimeng Hu<sup>b</sup>, Qiu Feng<sup>c</sup>, Meng Xie<sup>b</sup>, Bin  
Zhou<sup>b</sup>, Jia Yang<sup>d</sup>, Hengchang Nie<sup>a,b\*</sup>, Zhipeng Gao<sup>c,d\*</sup> and Genshui  
Wang<sup>a,b\*</sup>*

a. School of Chemistry and Materials Science, Hangzhou Institute for Advanced Study,  
University of Chinese Academy of Sciences, Hangzhou 310024, China

b. Key Laboratory of Inorganic Functional Materials and Devices, Shanghai Institute  
of Ceramics, Chinese Academy of Sciences, Shanghai 200050, China

c. Joint Laboratory for Extreme Conditions Matter Properties, Southwest University of  
Science and Technology, Mianyang 621002, China

d. Institute of Fluid Physics, China Academy of Engineering Physics, Mianyang  
621900, China

**KEYWORDS:** ferroelectrics, energy storage, multilayer ceramic capacitors, high  
power density systems

\*Corresponding authors.

E-mail addresses: sestonenhc@mail.sic.ac.cn (H. Nie), z.p.gao@foxmail.com (Z. Gao),  
genshuiwang@mail.sic.ac.cn (G. Wang).

| Sample<br>(unpoled) | Unit cell parameters(Å) |                      | Weight fraction<br>in % | Fitting<br>parameter |
|---------------------|-------------------------|----------------------|-------------------------|----------------------|
|                     | Phase 1, <i>R3c</i>     | Phase 2, <i>P4bm</i> |                         |                      |
| BNT-BA-NN           | $a=b=5.48186$           | $a=b=5.499030$       | $R3c=98.46$             | $\chi^2=1.87$        |
|                     | $c=13.4890$             | $c=4.034300$         | $P4bm=1.54$             | $R_p=2.31$           |
|                     | $c/a=2.4593$            | $c/a=0.7336$         |                         | $R_{wp}=3.04$        |
|                     | volume=351.047          | volume=121.994       |                         | $R_{exp}=2.22$       |

Table S1. Refined refinement results of unpoled BNT-BA-NN ceramic.

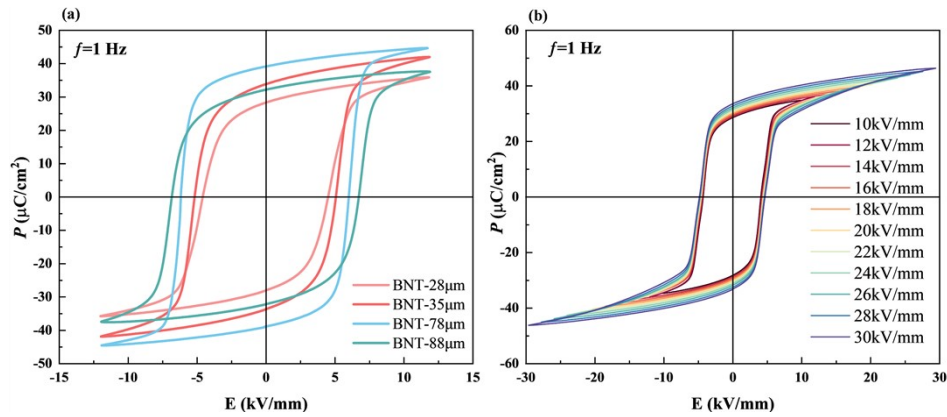

Figure S1. (a)  $P$ - $E$  loops of BNT MLCCs; (b)  $P$ - $E$  loops of BNT-28 $\mu\text{m}$  MLCCs.

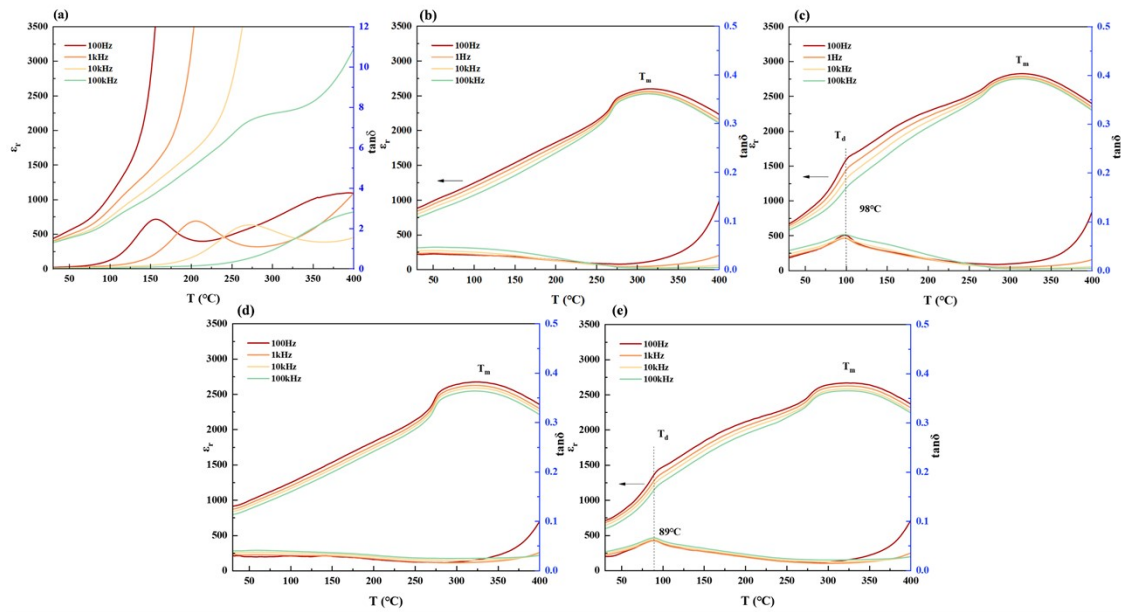

Figure S2. The temperature dependencies of dielectric permittivity ( $\epsilon_r$ ) and loss tangent ( $\tan\delta$ ) measured at selected frequencies for (a) unpoled BNT-88 $\mu\text{m}$  MLCCs; (b) unpoled and (c) poled BNT-35 $\mu\text{m}$  MLCCs; (d) unpoled and (e) poled BNT-28 $\mu\text{m}$  MLCCs.

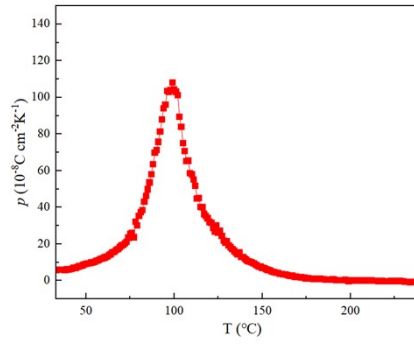

Figure S3. The pyroelectric coefficient of BNT-35 $\mu\text{m}$  MLCC.
